# Supplementary material
Source: publisher site journal article supplement (https://neobiota.pensoft.net/article/23398/download/suppl/38/)
Supplement: Supplementary file 1

Supplementary File 8.  $r$ -cost curves for different seed survival scenarios and reference data sets

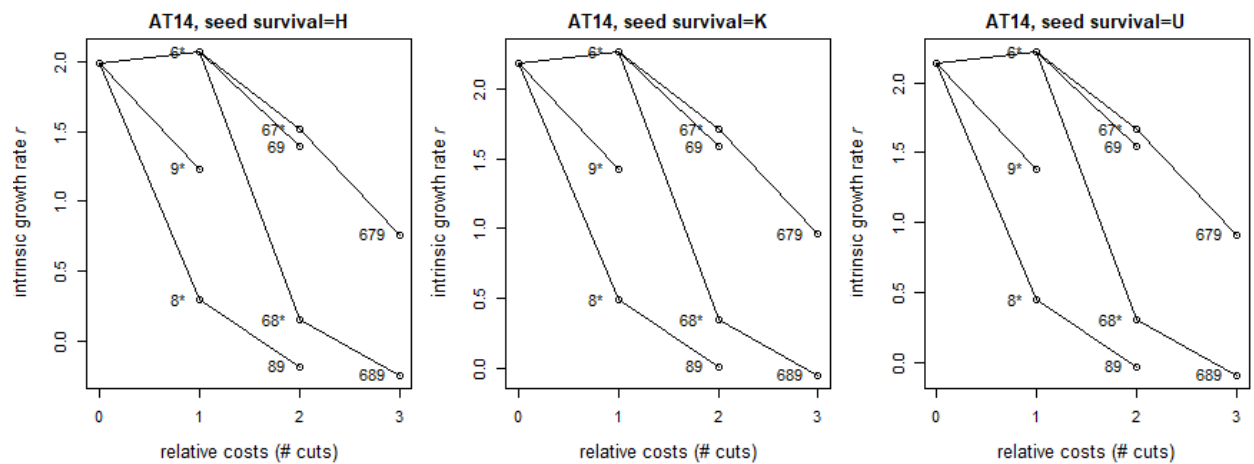

Fig. S14. Effect-cost curves of mowing regimes for the Austrian reference population in 2014 (AT14) for each seed survival scenario. For each mowing regime (dots with labels indicating the months of cutting, see Table 1) and the untreated control (the dot at  $x=0$ ), the intrinsic growth rate  $r$  (as mean of the 5 years of experimental data) is plotted versus the relative costs of the regime (equalling the number of cuts). Mowing regimes theoretically simulated (by removing or adding the September cut to experimental treatments in the model, see Table 1) are indicated with an asterisk. Lines connect consecutive cuts, showing how extending mowing regimes with additional cuts alters  $r$ .

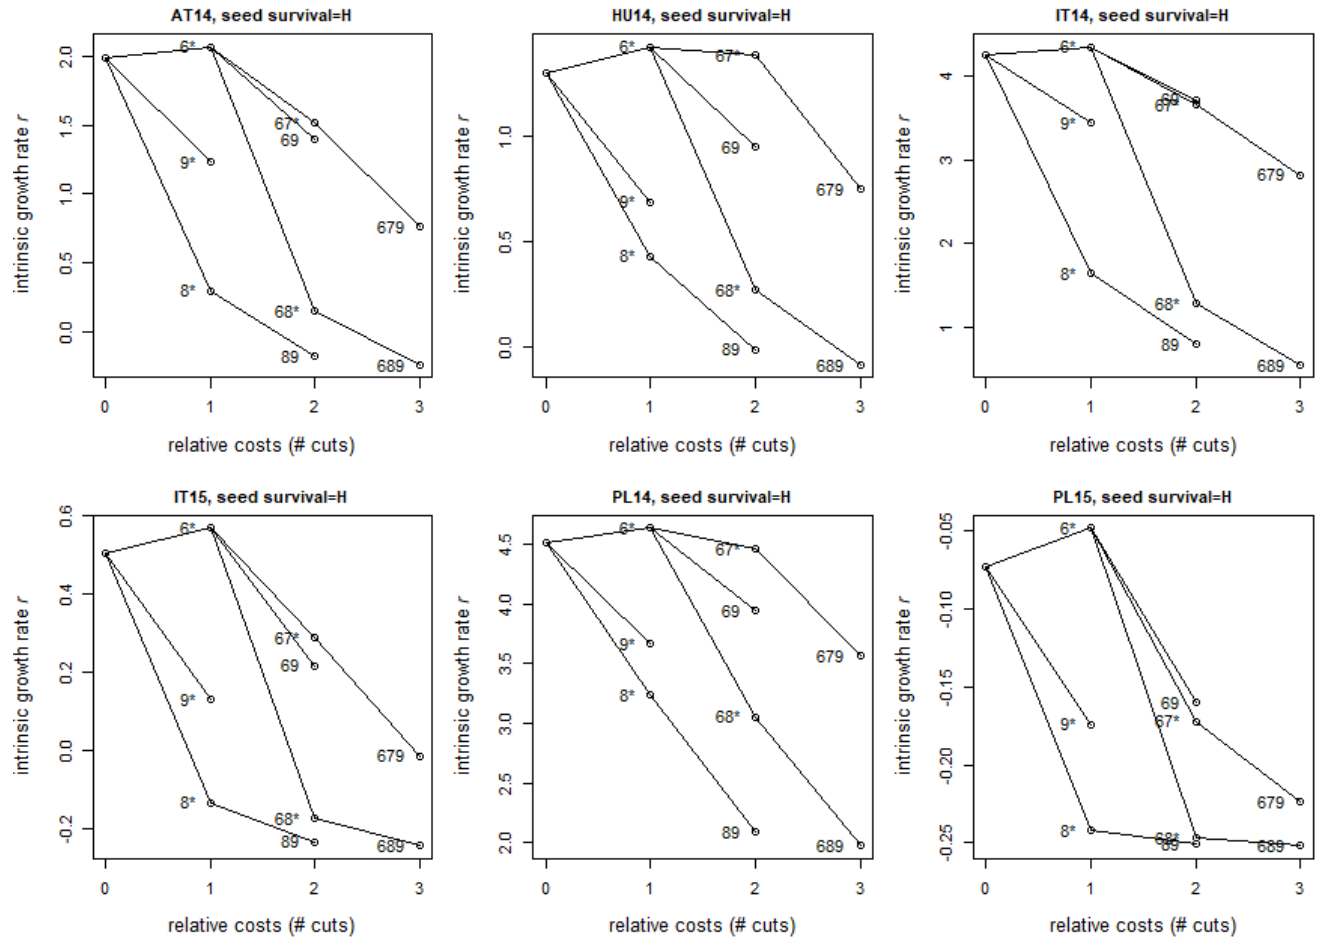

Fig. S15. Effect-cost curves for each reference population (seed survival scenario H), as Fig. S14.
